# Supplementary material for: ‘Optimized route’ to synthesize isoelectronic and isostructural Au(iii)- and Pt(ii)-NHC complexes: synthesis, structure, spectral properties, electrochemistry, and molecular docking studies
Source: Royal Society of Chemistry journal article supplement (doi:10.1039/d2nj03661d), 2022-11-21
Supplement: d2nj03661d1.pdf [file d2nj03661d1.pdf]

**'Optimized Route' to Synthesis Isolectronic and Isostructural Au(III)- and Pt(II)-NHC Complexes;  
Synthesis, Structure, Spectral Properties, Electrochemistry, and Molecular Docking Studies**

Lakshmikanta Maity,<sup>a</sup> Sahadev Barik,<sup>b</sup> Hemanta K. Kisan,<sup>a</sup> Abhimanyu Jana,<sup>c</sup> Anvarhusein A. Isab,<sup>d</sup> and Joydev Dinda<sup>a\*</sup>

<sup>a</sup> Department of Chemistry, Utkal University, Bhubaneswar-751004, Odisha, India.

<sup>b</sup> School of Chemical Sciences, National Institute of Science Education and Research, HBNI, Bhubaneswar-751004, Odisha, India.

<sup>c</sup> Department of Chemistry, Indian Institute of Engineering Science and Technology, Shibpur, Howrah-711103, West Bengal, India.

<sup>d</sup>Department of Chemistry, King Fahd University of Petroleum and Minerals, Dhahran 31261, Saudi Arabia

**Supporting Information**

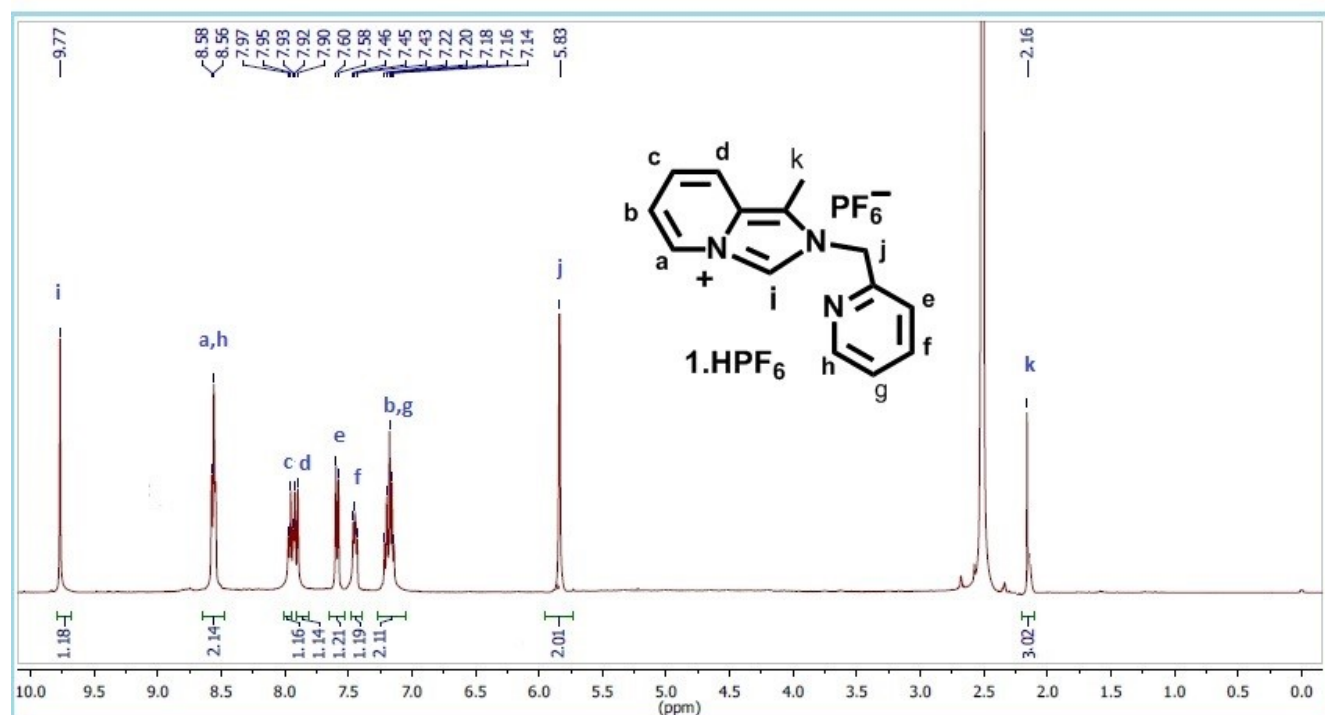

**Figure S1.** <sup>1</sup>H NMR spectrum of 1.HPF<sub>6</sub> in DMSO-d<sub>6</sub>.

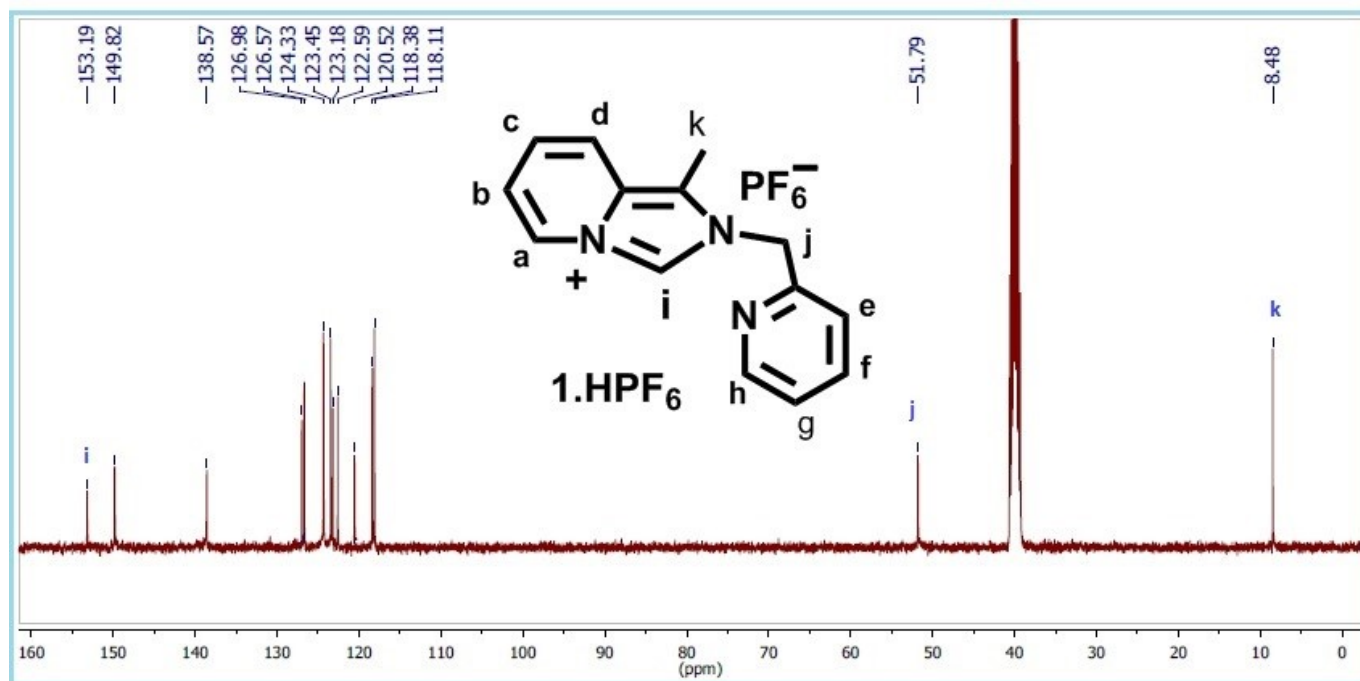

**Figure S2.**  $^{13}\text{C}$  NMR spectrum of **1**.HPF<sub>6</sub> in DMSO- $d_6$ .

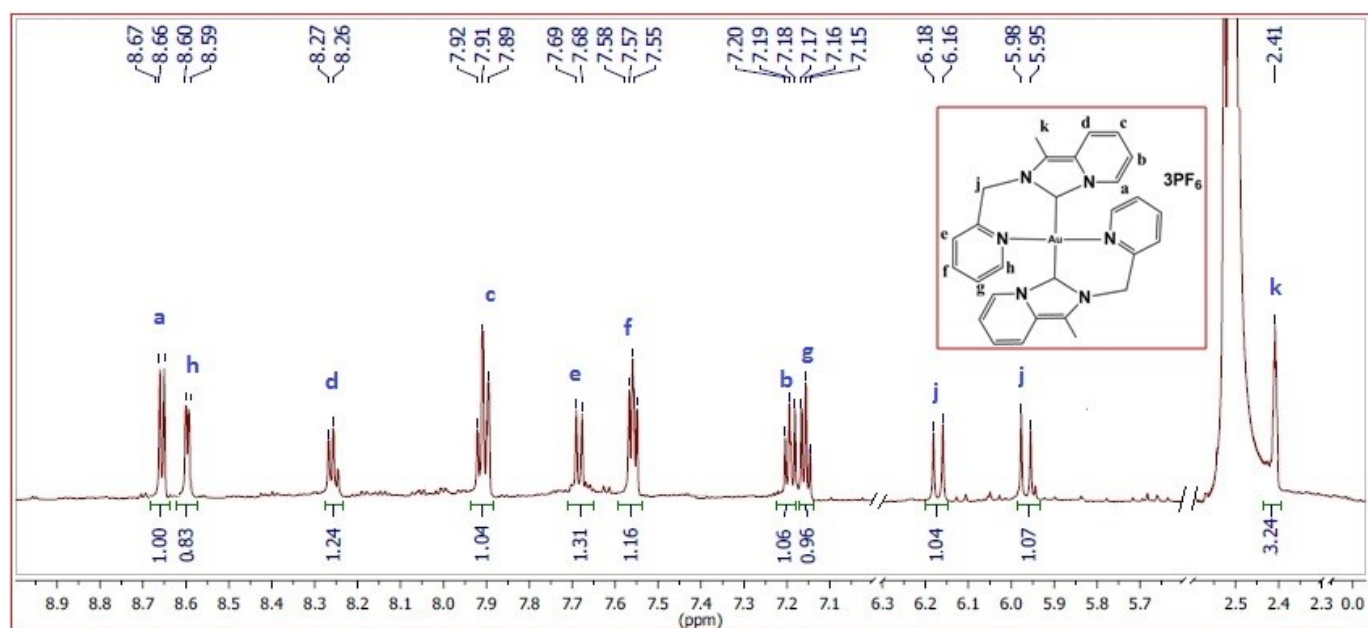

**Figure S3.**  $^1\text{H}$  NMR spectrum of complex **2** in DMSO- $d_6$ .

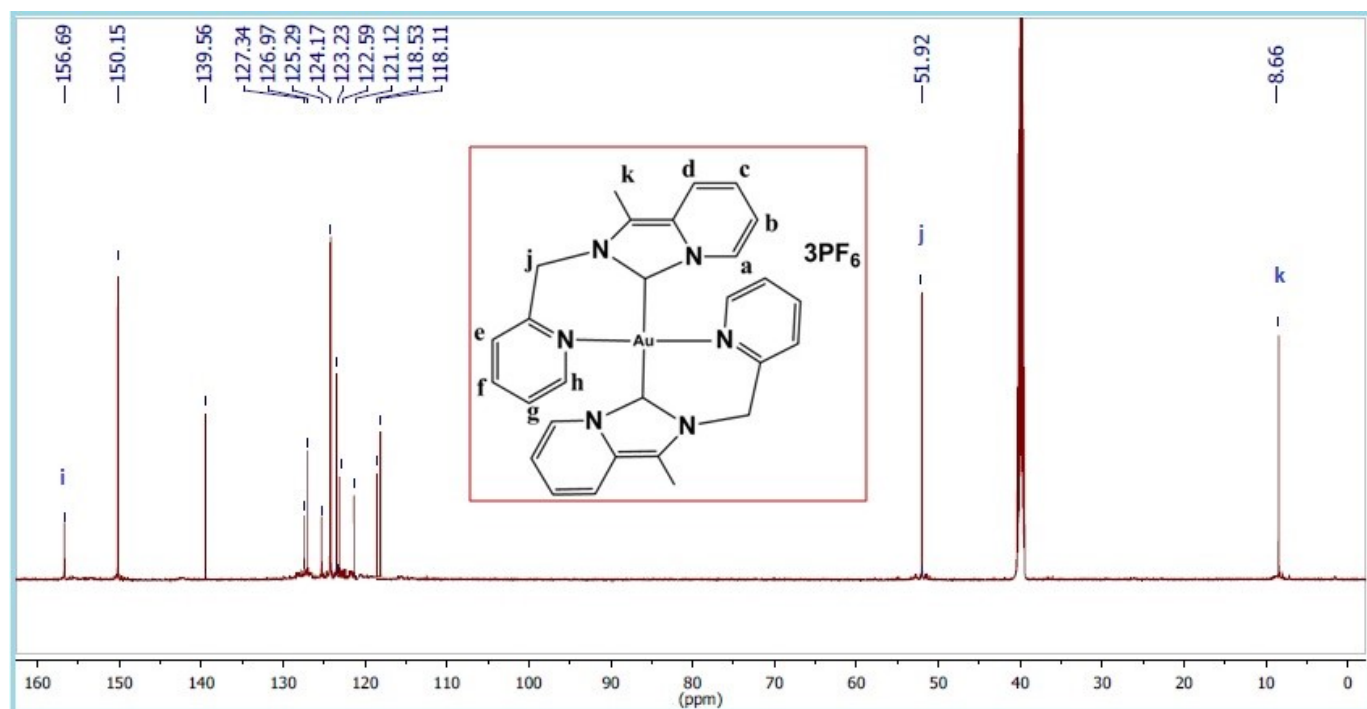

**Figure S4.**  $^{13}\text{C}$  NMR spectrum of complex **2** in  $\text{DMSO-d}_6$ .

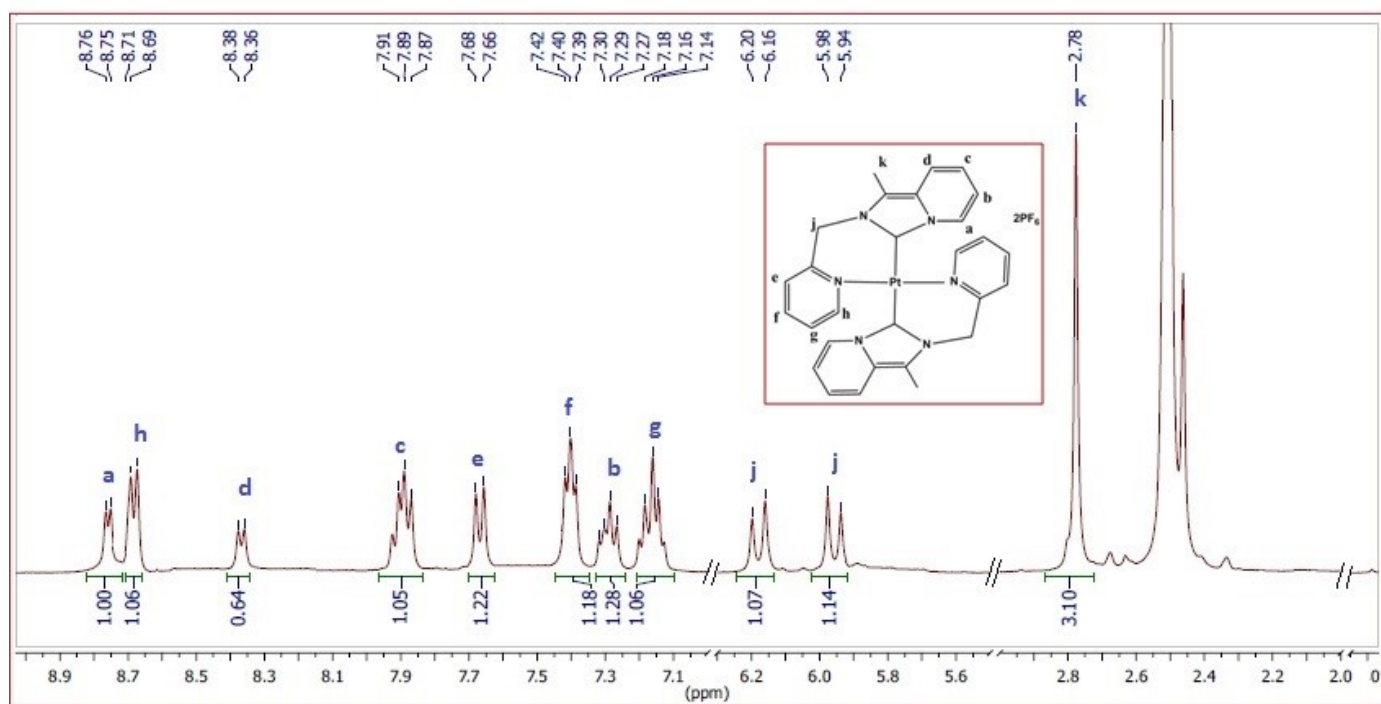

**Figure S5.**  $^1\text{H}$  NMR spectrum of complex **3** in  $\text{DMSO-d}_6$ .

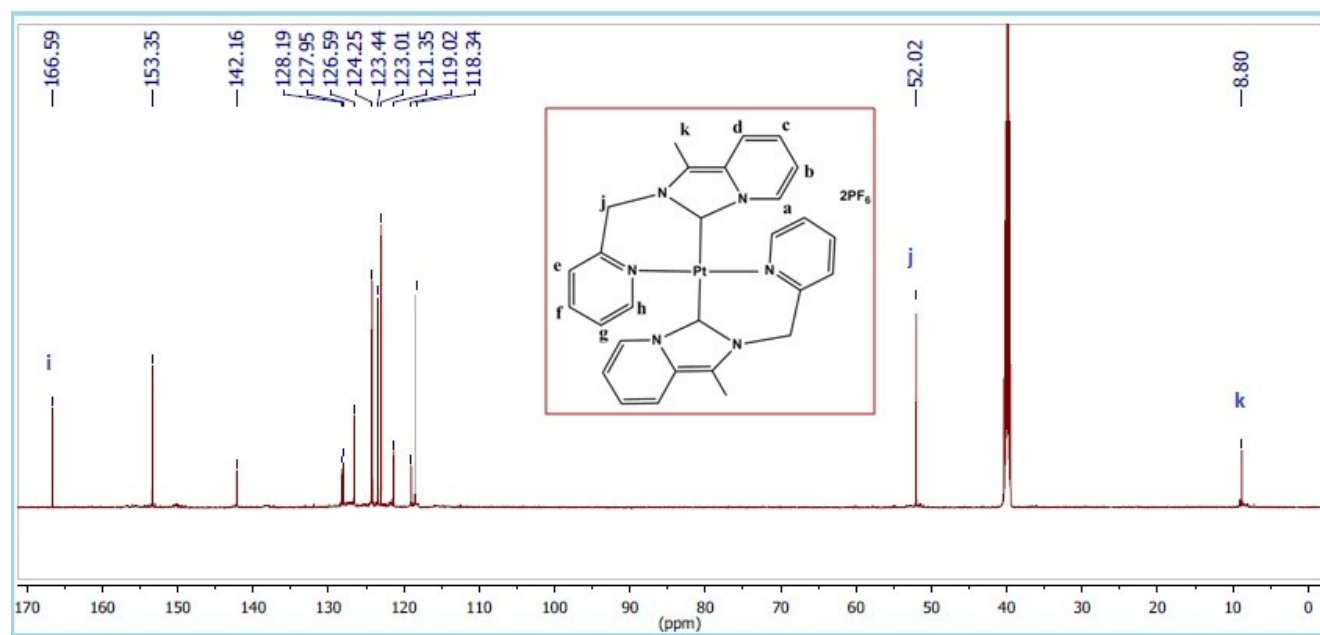

**Figure S6.** <sup>13</sup>C NMR spectrum of complex **3** in DMSO-d<sub>6</sub>.

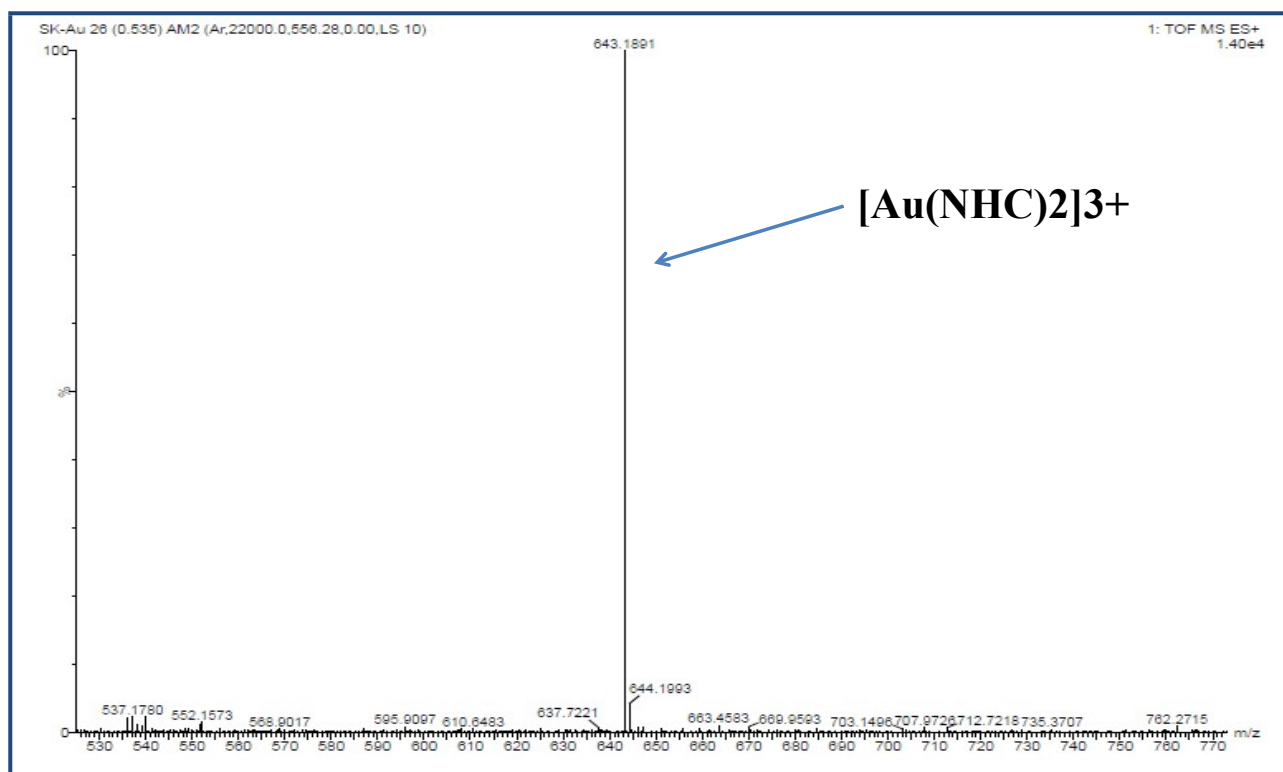

**Figure S7.** HRMass spectrum of complex **2**.

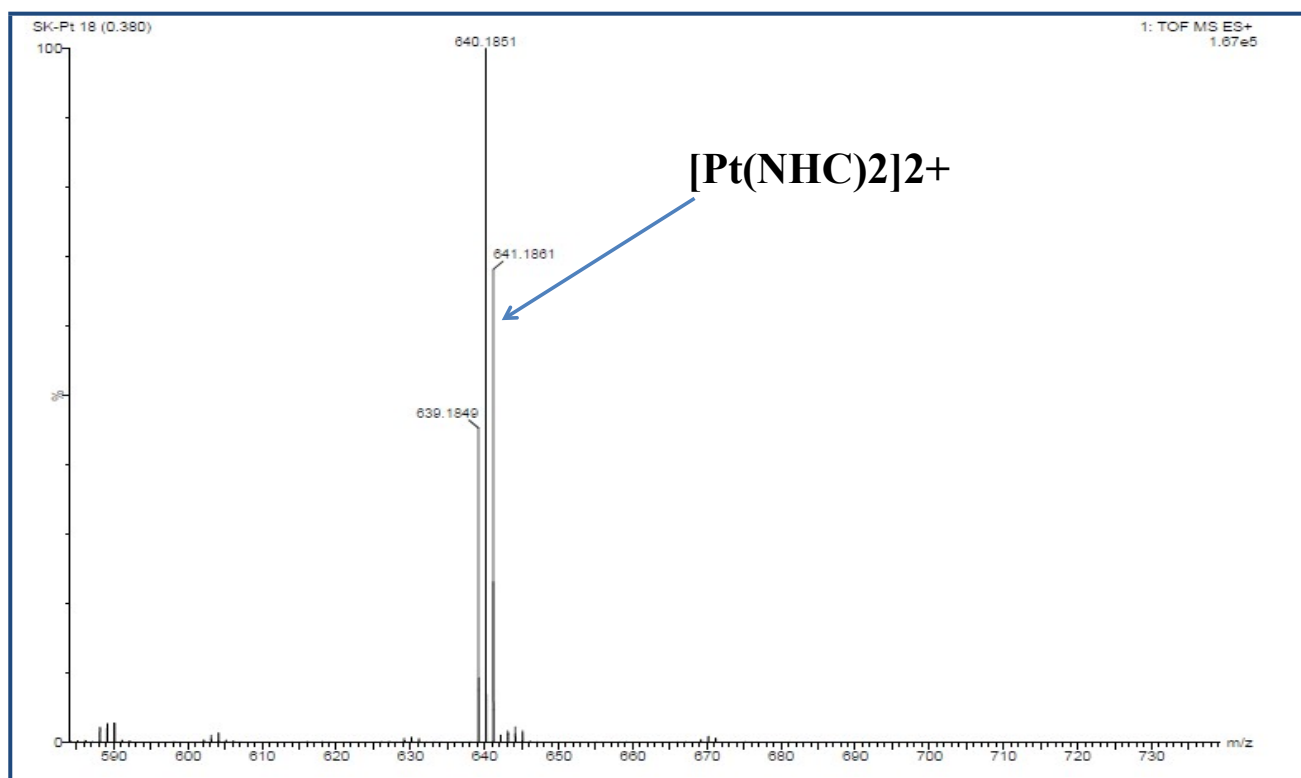

**Figure S8.** HRMass spectrum of complex **3**.

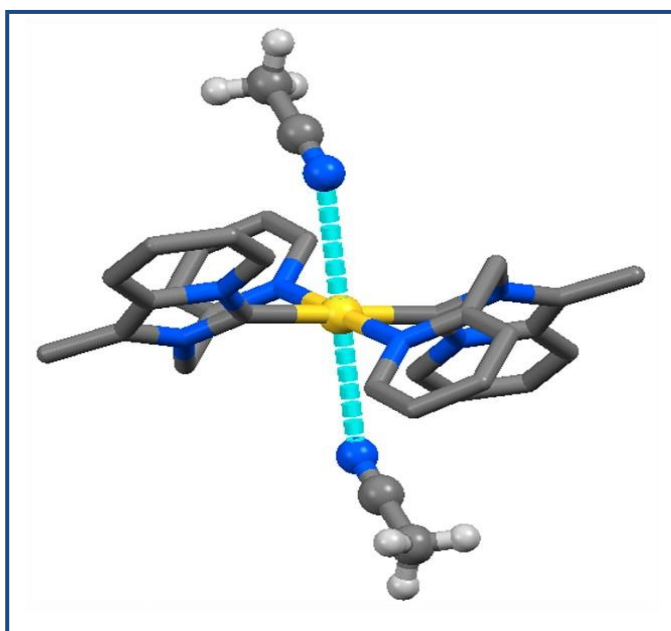

**Figure S9.** Distorted octahedral shape around Au(III) ion of complex **2**.

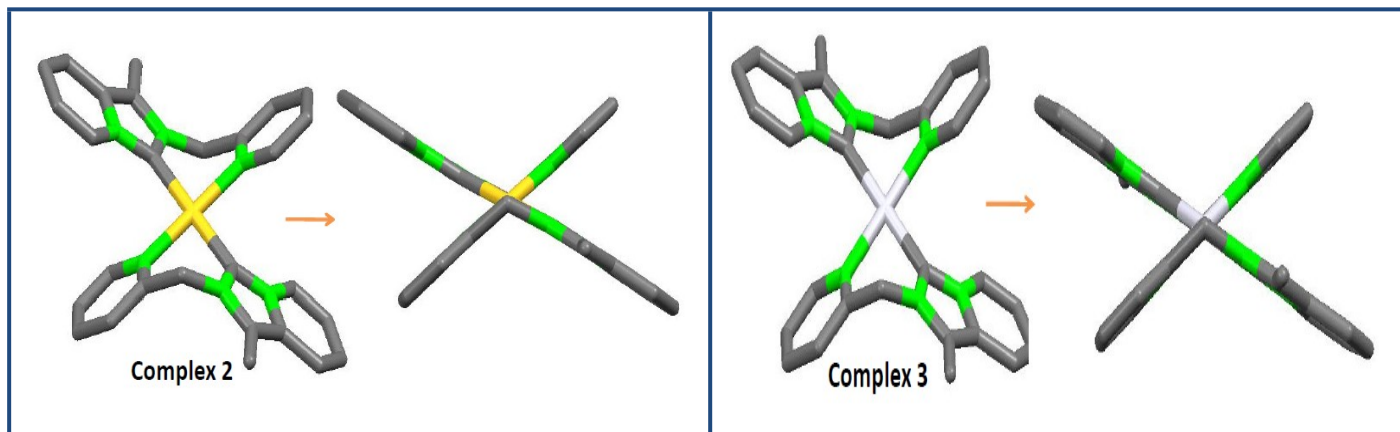

**Figure S10.** Butterfly like view of complex **2**(left) and complex **3** (right).

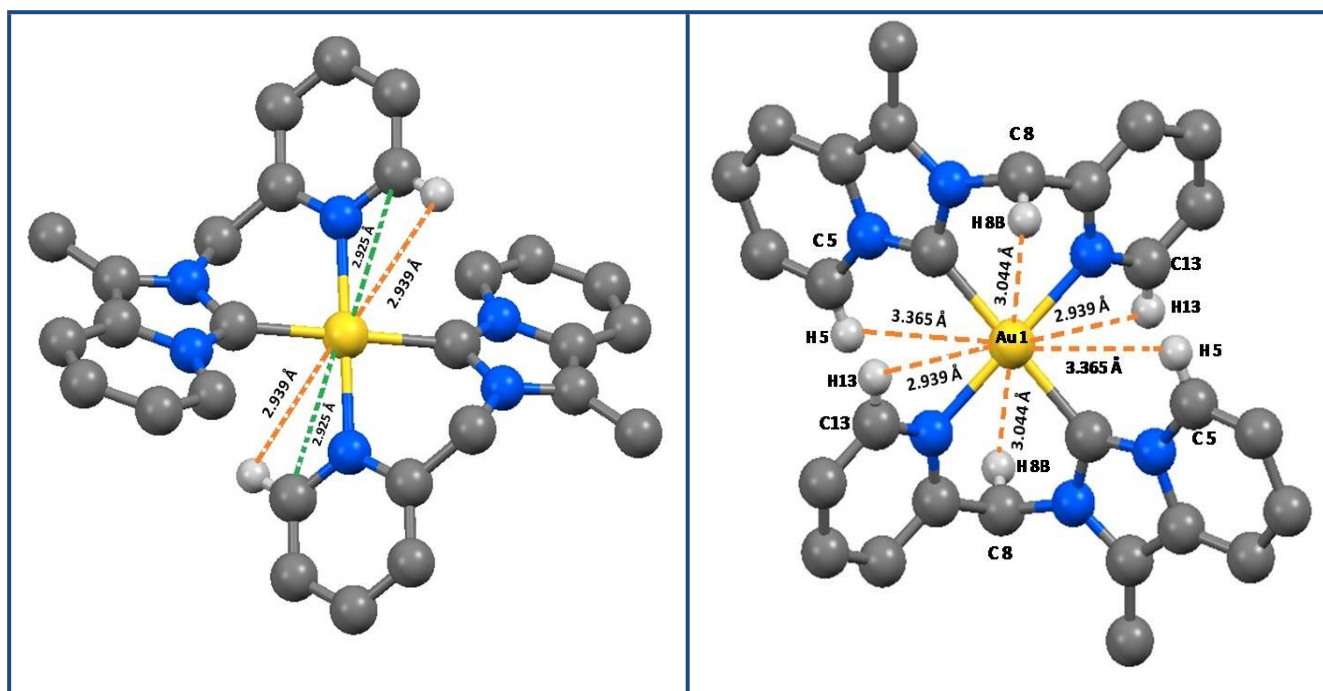

**Figure S11.** Various intramolecular Au(III)···H-C interactions present in complex **2**.

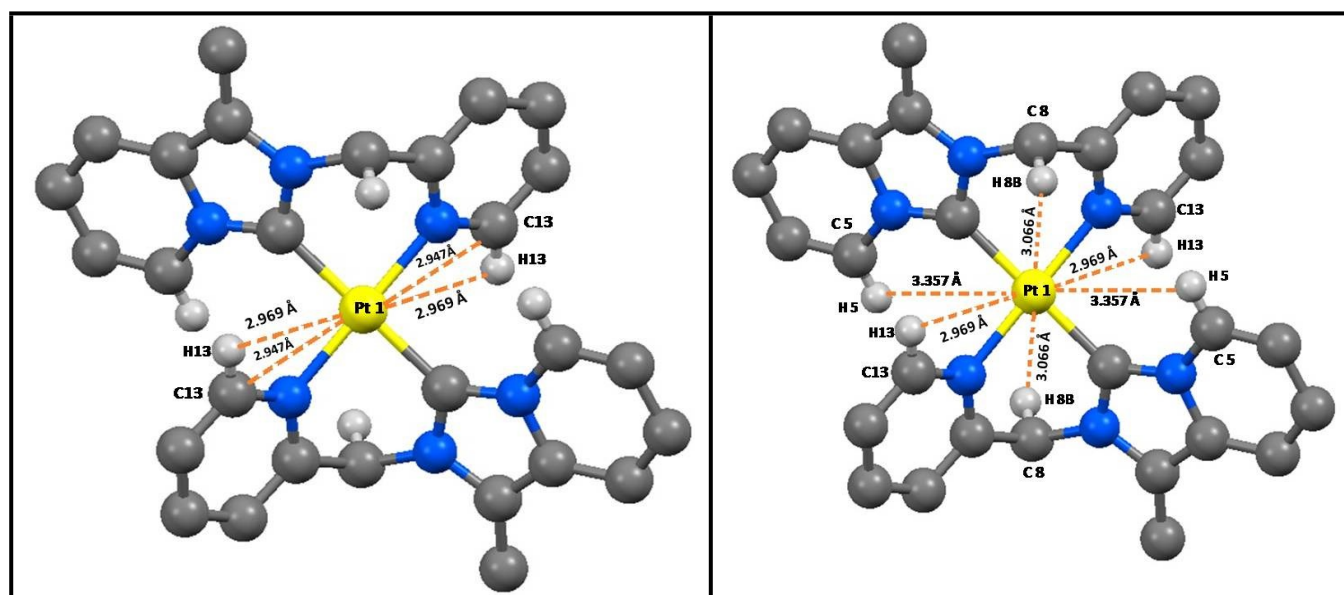

**Figure S12.** Various intramolecular Pt(II)···H-C interactions present in complex **3**.

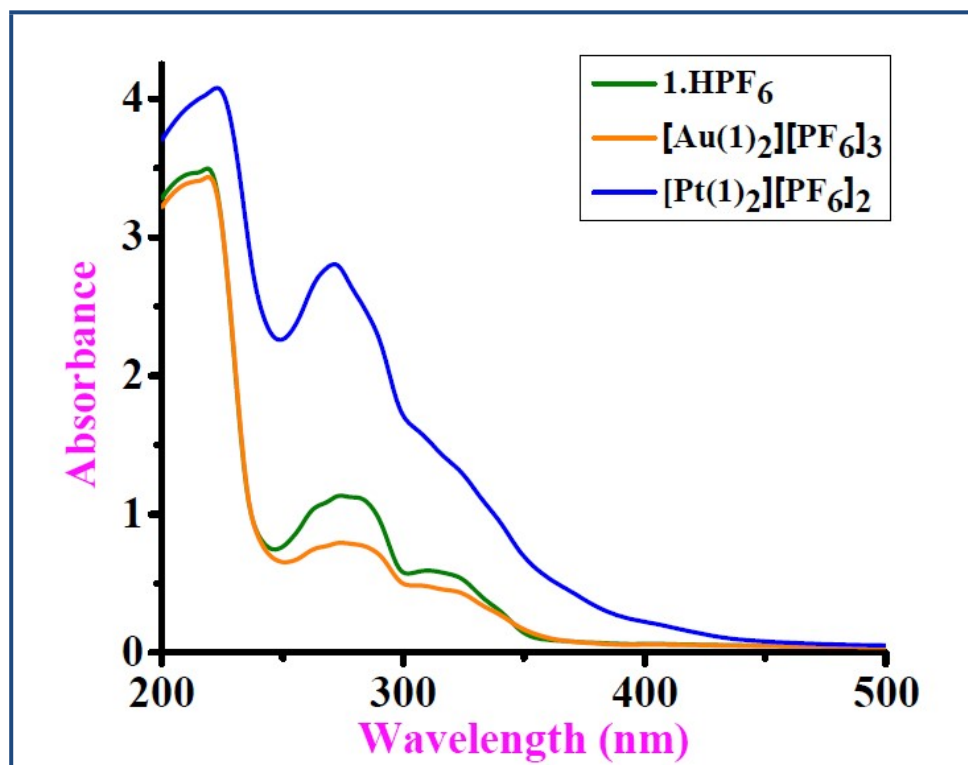

**Figure S13.** Absorption spectra of complexes **2** (Au-complex) and **3** (Pt-complex) and proligand **1**.HPF<sub>6</sub> studied in DCM solution at room temperature at 50 μM conc.

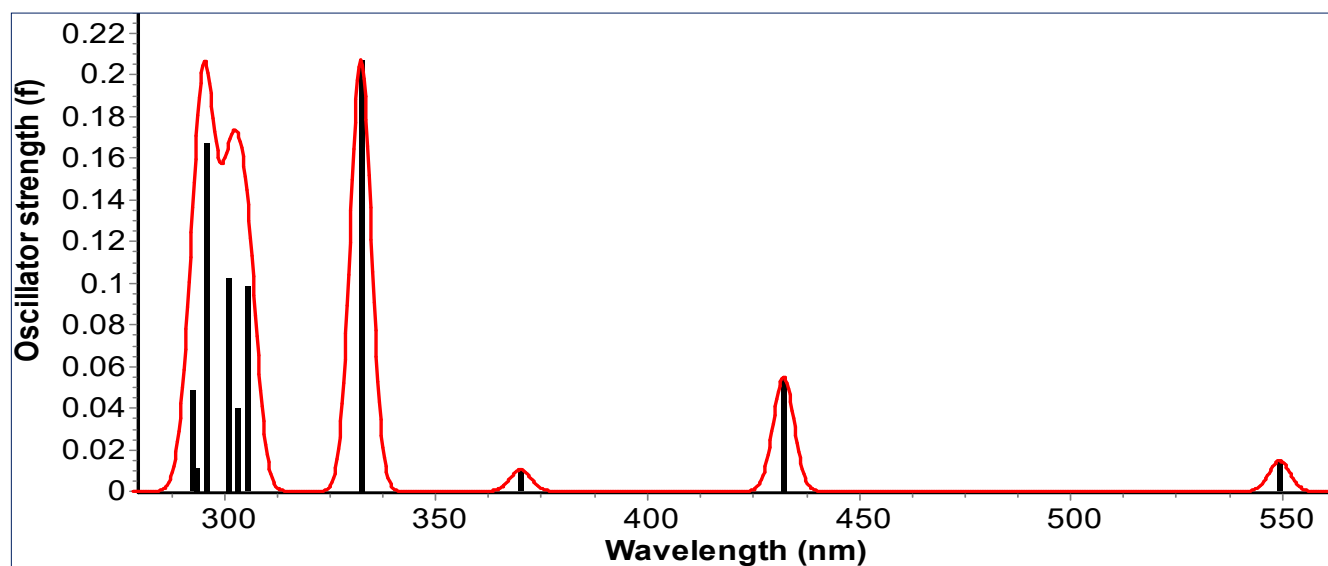

**Figure S14.** Simulated absorption spectra of Complex **2** in CH<sub>3</sub>CN using TD-DFT Computation.

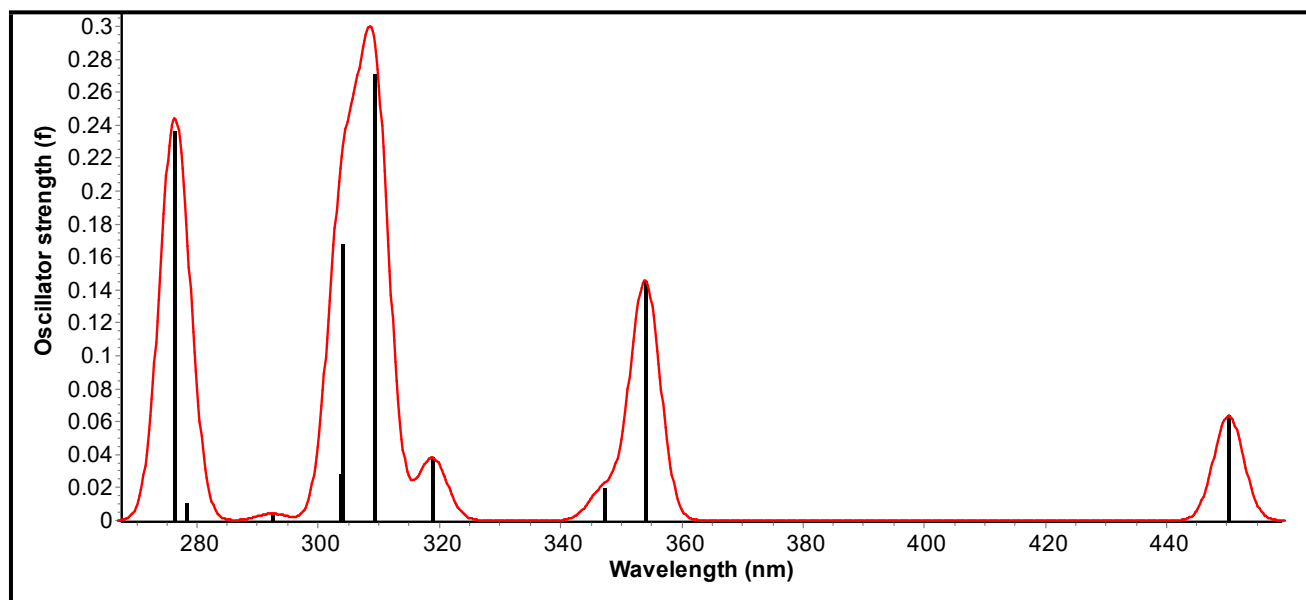

**Figure S15.** Simulated absorption spectra of Complex **3** in CH<sub>3</sub>CN using TD-DFT Computation.

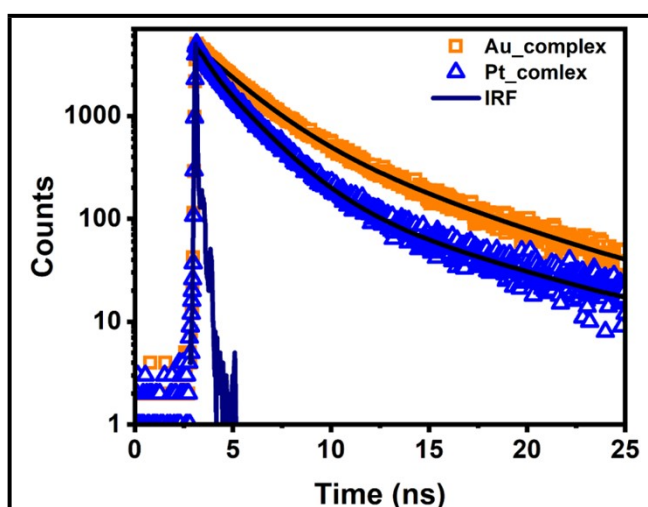

**Figure S16.** Time resolved fluorescence spectra of complex-**2** and **3** in dry CH<sub>3</sub>CN solution with  $\lambda_{ex}$  = 340 nm. The solid navy-blue line represents the instrument response function (IRF) of the system.

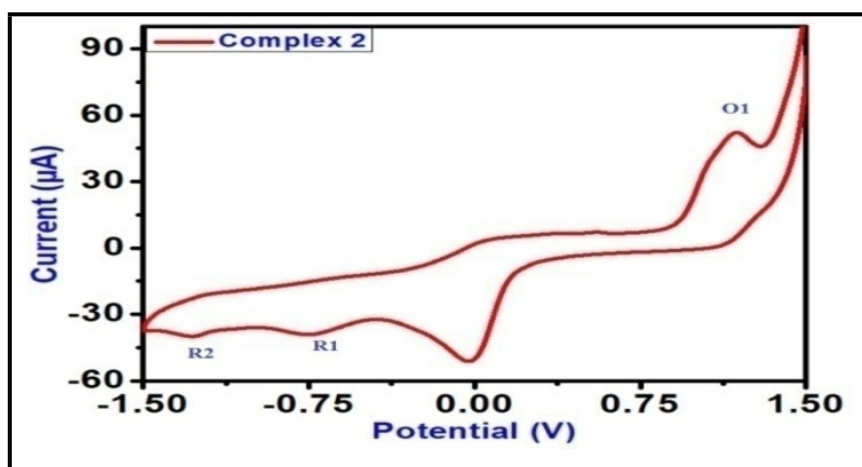

**Figure S17.** The cyclic voltammogram of complex **2** in dry acetonitrile at a 100 mVs<sup>-1</sup> scan rate with Pt as the working electrode, Ag/AgCl as the reference electrode, and a 0.1(M) solution of [N(Bu)<sub>4</sub>]PF<sub>6</sub> as the supporting electrolyte.

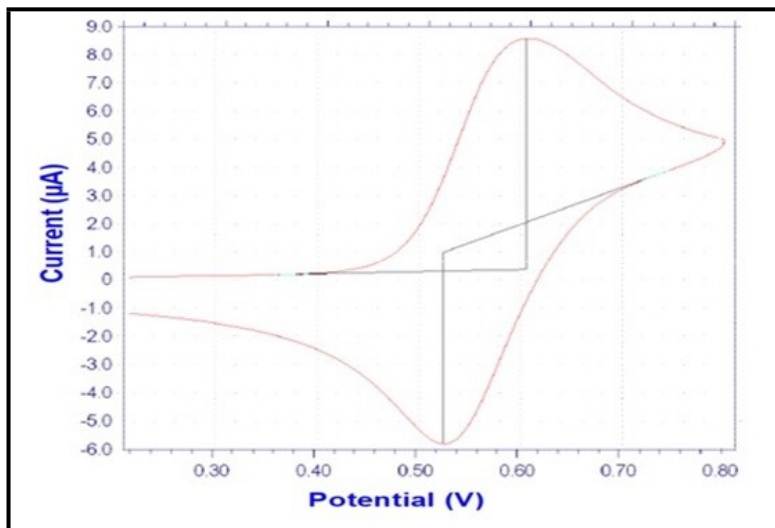

**Figure S18.** The cyclic voltammogram of **3** in dry acetonitrile at a  $100 \text{ mVs}^{-1}$  scan rate with Pt as the working electrode, Ag/AgCl as the reference electrode, and a 0.1(M) solution of  $[\text{N}(\text{Bu})_4]\text{PF}_6$  as the supporting electrolyte.

**Table S1.**Summary of X-Ray crystallographic data of **2** and **3**.

| <b>Complex parameters</b>                  | <b>2</b>                                                                         | <b>3</b>                                                                        |
|--------------------------------------------|----------------------------------------------------------------------------------|---------------------------------------------------------------------------------|
| Empirical formula                          | C <sub>36</sub> H <sub>38</sub> N <sub>10</sub> AuP <sub>3</sub> F <sub>18</sub> | C <sub>30</sub> H <sub>29</sub> N <sub>7</sub> PtP <sub>2</sub> F <sub>12</sub> |
| Formula weight                             | 1242.64                                                                          | 972.63                                                                          |
| Crystal system                             | Triclinic                                                                        | Monoclinic                                                                      |
| Space group                                | P -1                                                                             | C 2/c                                                                           |
| Temperature /K                             | 295                                                                              | 100                                                                             |
| a / Å                                      | 10.5186(13)                                                                      | 14.3168(16)                                                                     |
| b / Å                                      | 11.1996(14)                                                                      | 20.207(2)                                                                       |
| c / Å                                      | 11.4763(14)                                                                      | 12.3606(14)                                                                     |
| α (°)                                      | 67.964(4)                                                                        | 90(4)                                                                           |
| β (°)                                      | 89.955(4)                                                                        | 103.347(4)                                                                      |
| γ (°)                                      | 69.998(4)                                                                        | 90(4)                                                                           |
| Volume / Å <sup>3</sup>                    | 1164.9(3)                                                                        | 3479.2(7)                                                                       |
| Z                                          | 1                                                                                | 4                                                                               |
| Density / g cm <sup>-3</sup>               | 1.771                                                                            | 1.857                                                                           |
| Absorption coefficient (mm <sup>-1</sup> ) | 3.373                                                                            | 9.320                                                                           |
| Theta range                                | 2.628 to 25.460                                                                  | 7.304 to 76.747                                                                 |
| Index ranges                               | -12<=h<=12,<br>-13<=k<=13,<br>-13<=l<=13                                         | -16<=h<=17,<br>-23<=k<=24,<br>-13<=l<=13                                        |
| Total / unique / obs. data                 | 23197 / 4295 / 4294                                                              | 42953 / 3355 / 3187                                                             |
| No. of Parameters                          | 313                                                                              | 240                                                                             |
| Final R indices [I>2σ(I)]                  | R1 = 0.0287,<br>wR2 = 0.0777                                                     | R1 = 0.0382,<br>wR2 = 0.1020                                                    |
| R indices (all data)                       | R1 = 0.0287,<br>wR2 = 0.0777                                                     | R2 = 0.0396,<br>wR2 = 0.1034                                                    |
| GOF                                        | 1.039                                                                            | 1.149                                                                           |

**Table S2.** Selected bond lengths (Å) of various **M...H-C** interactions of complex **2** and **3**.

| <b>M...H/<br/>M...C</b> | <b>Complex 2 (Å)<br/>M= Au(III)</b> | <b>Complex 3 (Å)<br/>M= Pt(II)</b> |
|-------------------------|-------------------------------------|------------------------------------|
| M(1)···H(13)            | 2.939                               | 2.969                              |
| M(1)···H(8B)            | 3.044                               | 3.066                              |
| M(1)···H(5)             | 3.365                               | 3.357                              |
| <b>Ave.</b>             | 3.116                               | 3.131                              |
| M(1)···C(13)            | 2.925                               | 2.947                              |
| M(1)···C(8)             | 3.150                               | 3.160                              |
| M(1)···C(5)             | 3.663                               | 3.666                              |
| <b>Ave.</b>             | 3.246                               | 3.258                              |

**Table S3.** Selected bond angles (°) of various **M...H-C** interactions of complex **2** and **3**.

| <b>C-H...M/<br/>H-C...M</b> | <b>Complex 2<br/>M= Au(III) (°)</b> | <b>Complex 3<br/>M= Pt(II) (°)</b> |
|-----------------------------|-------------------------------------|------------------------------------|
| C(13)-H(13)···M(1)          | 80.04                               | 79.46                              |
| C(8)-H(8B)···M(1)           | 87.22                               | 86.28                              |
| C(5)-H(5)···M(1)            | 101.34                              | 101.46                             |
| <b>Ave.</b>                 | 89.53                               | 89.1                               |
| H(13)-C(13)···M(1)          | 81.71                               | 82.05                              |
| H(8)-C(8B)···M(1)           | 74.86                               | 75.49                              |
| H(5)-C(5)···M(1)            | 64.26                               | 63.83                              |
| <b>Ave.</b>                 | 73.61                               | 73.79                              |

**Table S4.** The docking results of NHC proligand (**1**.HPF<sub>6</sub>), Complex **2** and Complex **3** with Human-DNA Topoisomerase (ID: 1t8i) are given in Kcal/mol.

| compound                                | Binding<br>free<br>energy<br>$\Delta G_{\text{binding}}$<br>(Kcal/mol) | vdW+H<br>bond +<br>dissolving<br>energy<br>( $\Delta G_{\text{vdW+hb}} + \text{desolv}$ ) | Electr<br>ostatic<br>energy<br>( $\Delta G_{\text{elec}}$ ) | Total<br>internal<br>energy<br>( $\Delta G_{\text{total}}$ ) | Torsional<br>free<br>energy<br>( $\Delta G_{\text{tor}}$ ) | Unbound<br>system's<br>energy<br>( $\Delta G_{\text{unb}}$ ) | Estimated<br>Inhibition<br>Constant, $K_i$<br>(micromolar) | Reference<br>RMSD |
|-----------------------------------------|------------------------------------------------------------------------|-------------------------------------------------------------------------------------------|-------------------------------------------------------------|--------------------------------------------------------------|------------------------------------------------------------|--------------------------------------------------------------|------------------------------------------------------------|-------------------|
| Proligand<br><b>1</b> .HPF <sub>6</sub> | -5.73                                                                  | -6.33                                                                                     | -0.07                                                       | -0.15                                                        | +0.60                                                      | -0.15                                                        | 62.55                                                      | 31.60             |
| Complex <b>2</b>                        | -6.94                                                                  | -6.83                                                                                     | -0.11                                                       | +0.00                                                        | +0.00                                                      | +0.00                                                        | 8.20                                                       | 31.60             |
| Complex- <b>3</b>                       | -7.26                                                                  | -7.24                                                                                     | -0.02                                                       | +0.00                                                        | +0.00                                                      | +0.00                                                        | 4.75                                                       | 31.60             |

**Table S5.** Pharmacokinetic study parameters of proligand (**1.HPF<sub>6</sub>**)

|                                                                                                                                                                                                                                                                                                                                                                           |  |                                                                                                                                                                                                                                                                                                                                           |  |
|---------------------------------------------------------------------------------------------------------------------------------------------------------------------------------------------------------------------------------------------------------------------------------------------------------------------------------------------------------------------------|--|-------------------------------------------------------------------------------------------------------------------------------------------------------------------------------------------------------------------------------------------------------------------------------------------------------------------------------------------|--|
| 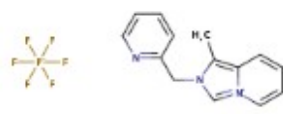                                                                                                                                                                                                                                                                                          |  |                                                                                                                                                                                                                                                                                                                                           |  |
| SMILES <chem>F[P-](F)(F)(F)(F)F.Cc1n(Cc2ccccc2)c[n+]2c1ccc2</chem>                                                                                                                                                                                                                                                                                                        |  |                                                                                                                                                                                                                                                                                                                                           |  |
| <b>Physicochemical Properties</b><br>Formula C <sub>14</sub> H <sub>14</sub> F <sub>6</sub> N <sub>3</sub> P<br>Molecular weight 389.25 g/mol<br>Num. heavy atoms 24<br>Num. arom. heavy atoms 15<br>Fraction Csp <sup>3</sup> 0.14<br>Num. rotatable bonds 2<br>Num. H-bond acceptors 7<br>Num. H-bond donors 0<br>Molar Refractivity 81.80<br>TPSA 35.51 Å <sup>2</sup> |  |                                                                                                                                                                                                                                                                                                                                           |  |
| <b>Lipophilicity</b><br>Log <i>P</i> <sub>OW</sub> (iLOGP) 0.00<br>Log <i>P</i> <sub>OW</sub> (XLOGP3) 6.16<br>Log <i>P</i> <sub>OW</sub> (WLOGP) 7.88<br>Log <i>P</i> <sub>OW</sub> (MLOGP) 2.41<br>Log <i>P</i> <sub>OW</sub> (SILICOS-IT) 1.95<br>Consensus Log <i>P</i> <sub>OW</sub> 3.68                                                                            |  |                                                                                                                                                                                                                                                                                                                                           |  |
|                                                                                                                                                                                                                                                                                                                                                                           |  | <b>Water Solubility</b><br>Log <i>S</i> (ESOL) -6.34<br>Solubility 1.69e-04 mg/ml ; 4.58e-07 mol/l<br>Class Poorly soluble<br>Log <i>S</i> (Ali) -6.89<br>Solubility 7.55e-05 mg/ml ; 2.05e-07 mol/l<br>Class Poorly soluble<br>Log <i>S</i> (SILICOS-IT) -4.21<br>Solubility 2.29e-02 mg/ml ; 6.19e-05 mol/l<br>Class Moderately soluble |  |
|                                                                                                                                                                                                                                                                                                                                                                           |  | <b>Pharmacokinetics</b><br>GI absorption Low<br>BBB permeant No<br>P-gp substrate Yes<br>CYP1A2 inhibitor Yes<br>CYP2C19 inhibitor Yes<br>CYP2C9 inhibitor No<br>CYP2D6 inhibitor No<br>CYP3A4 inhibitor Yes<br>Log <i>K</i> <sub>p</sub> (skin permeation) -4.18 cm/s                                                                    |  |
|                                                                                                                                                                                                                                                                                                                                                                           |  | <b>Druglikeness</b><br>Lipinski Yes; 0 violation<br>Ghose No; 1 violation: WLOGP>5.6<br>Veber Yes<br>Egan No; 1 violation: WLOGP>5.88<br>Muegge No; 1 violation: XLOGP3>5<br>Bioavailability Score 0.55                                                                                                                                   |  |
|                                                                                                                                                                                                                                                                                                                                                                           |  | <b>Medicinal Chemistry</b><br>PAINS 0 alert<br>Brenk 2 alerts: phosphor, quaternary_nitrogen_1<br>Leadlikeness No; 2 violations: MW>350, XLOGP3>3.5<br>Synthetic accessibility 2.50                                                                                                                                                       |  |

**Table S6. Pharmacokinetic study parameters of complex 2.**

SMILES CC1=c2ccccc2C2N1Cc1ccccc1[Au]12C2N(Cc3n1cccc3)C(=c1n2cc1)C

#### Physicochemical Properties

|                        |              |
|------------------------|--------------|
| Formula                | C28H28AuN6   |
| Molecular weight       | 645.53 g/mol |
| Num. heavy atoms       | 35           |
| Num. arom. heavy atoms | 24           |
| Fraction Csp3          | 0.21         |
| Num. rotatable bonds   | 0            |
| Num. H-bond acceptors  | 0            |
| Num. H-bond donors     | 0            |
| Molar Refractivity     | 141.57       |
| TPSA <sup>1</sup>      | 26.20 Å²     |

#### Lipophilicity

|                                         |       |
|-----------------------------------------|-------|
| Log $P_{o/w}$ (iLOGP) <sup>2</sup>      | 0.00  |
| Log $P_{o/w}$ (XLOGP3) <sup>3</sup>     | 5.11  |
| Log $P_{o/w}$ (WLOGP) <sup>1</sup>      | 1.91  |
| Log $P_{o/w}$ (MLOGP) <sup>2</sup>      | 2.00  |
| Log $P_{o/w}$ (SILICOS-IT) <sup>2</sup> | -2.84 |
| Consensus Log $P_{o/w}$ <sup>3</sup>    | 1.23  |

| Water Solubility                |                                 |
|---------------------------------|---------------------------------|
| Log S (ESOL) <sup>2</sup>       | -7.57                           |
| Solubility                      | 1.74e-05 mg/ml ; 2.70e-08 mol/l |
| Class <sup>2</sup>              | Poorly soluble                  |
| Log S (Ali) <sup>1</sup>        | -5.40                           |
| Solubility                      | 2.55e-03 mg/ml ; 3.94e-06 mol/l |
| Class <sup>2</sup>              | Moderately soluble              |
| Log S (SILICOS-IT) <sup>2</sup> | -6.09                           |
| Solubility                      | 5.19e-04 mg/ml ; 8.04e-07 mol/l |
| Class <sup>2</sup>              | Poorly soluble                  |

#### Pharmacokinetics

|                                          |            |
|------------------------------------------|------------|
| GI absorption <sup>1</sup>               | High       |
| BBB permeant <sup>3</sup>                | Yes        |
| P-gp substrate <sup>3</sup>              | Yes        |
| CYP1A2 inhibitor <sup>3</sup>            | Yes        |
| CYP2C19 inhibitor <sup>3</sup>           | No         |
| CYP2C9 inhibitor <sup>3</sup>            | Yes        |
| CYP2D6 inhibitor <sup>3</sup>            | No         |
| CYP3A4 inhibitor <sup>3</sup>            | No         |
| Log $K_p$ (skin permeation) <sup>2</sup> | -6.61 cm/s |

#### Druglikeness

|                                    |                                              |
|------------------------------------|----------------------------------------------|
| Lipinski <sup>2</sup>              | Yes; 1 violation: MW>500                     |
| Ghose <sup>2</sup>                 | No; 2 violations: MW>480, MR>130             |
| Veber <sup>2</sup>                 | Yes                                          |
| Egan <sup>2</sup>                  | Yes                                          |
| Muegge <sup>2</sup>                | No; 3 violations: MW>600, XLOGP3>5, #rings>7 |
| Bioavailability Score <sup>2</sup> | 0.55                                         |

#### Medicinal Chemistry

|                                      |                                      |
|--------------------------------------|--------------------------------------|
| PAINS <sup>3</sup>                   | 0 alert                              |
| Brenk <sup>3</sup>                   | 0 alert                              |
| Leadlikeness <sup>3</sup>            | No; 2 violations: MW>350, XLOGP3>3.5 |
| Synthetic accessibility <sup>3</sup> | 6.24                                 |

**Table S7.** Pharmacokinetic study parameters of complex **3**.

|                                                                                                                                                                        |                                                   |                                      |                                              |
|------------------------------------------------------------------------------------------------------------------------------------------------------------------------|---------------------------------------------------|--------------------------------------|----------------------------------------------|
| 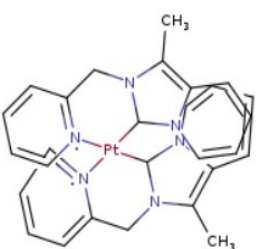<br>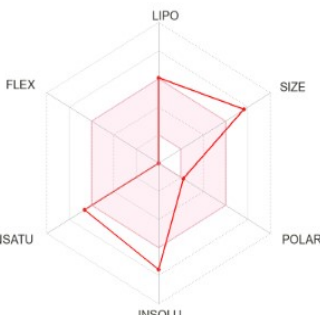 |                                                   | <b>Water Solubility</b>              |                                              |
| <b>SMILES</b> <chem>CC1=c2cccn2C2N1Cc1cccn1[Pt]12C2N(Cc3n1ccc3)C(=c1n2ccc1)C</chem>                                                                                    |                                                   | Log S (ESOL)                         | -7.56                                        |
|                                                                                                                                                                        |                                                   | Solubility                           | 1.78e-05 mg/ml ; 2.77e-08 mol/l              |
|                                                                                                                                                                        |                                                   | Class                                | Poorly soluble                               |
|                                                                                                                                                                        |                                                   | Log S (Ali)                          | -5.40                                        |
|                                                                                                                                                                        |                                                   | Solubility                           | 2.54e-03 mg/ml ; 3.94e-06 mol/l              |
|                                                                                                                                                                        |                                                   | Class                                | Moderately soluble                           |
|                                                                                                                                                                        |                                                   | Log S (SILICOS-IT)                   | -6.09                                        |
|                                                                                                                                                                        |                                                   | Solubility                           | 5.22e-04 mg/ml ; 8.11e-07 mol/l              |
|                                                                                                                                                                        |                                                   | Class                                | Poorly soluble                               |
| <b>Physicochemical Properties</b>                                                                                                                                      |                                                   | <b>Pharmacokinetics</b>              |                                              |
| Formula                                                                                                                                                                | C <sub>28</sub> H <sub>28</sub> N <sub>6</sub> Pt | GI absorption                        | High                                         |
| Molecular weight                                                                                                                                                       | 643.64 g/mol                                      | BBB permeant                         | Yes                                          |
| Num. heavy atoms                                                                                                                                                       | 35                                                | P-gp substrate                       | Yes                                          |
| Num. arom. heavy atoms                                                                                                                                                 | 24                                                | CYP1A2 inhibitor                     | Yes                                          |
| Fraction Csp <sup>3</sup>                                                                                                                                              | 0.21                                              | CYP2C19 inhibitor                    | No                                           |
| Num. rotatable bonds                                                                                                                                                   | 0                                                 | CYP2C9 inhibitor                     | Yes                                          |
| Num. H-bond acceptors                                                                                                                                                  | 0                                                 | CYP2D6 inhibitor                     | No                                           |
| Num. H-bond donors                                                                                                                                                     | 0                                                 | CYP3A4 inhibitor                     | No                                           |
| Molar Refractivity                                                                                                                                                     | 141.57                                            | Log K <sub>p</sub> (skin permeation) | -6.60 cm/s                                   |
| TPSA                                                                                                                                                                   | 26.20 Å <sup>2</sup>                              | <b>Druglikeness</b>                  |                                              |
| <b>Lipophilicity</b>                                                                                                                                                   |                                                   | Lipinski                             | Yes; 1 violation: MW>500                     |
| Log P <sub>o/w</sub> (iLOGP)                                                                                                                                           | 0.00                                              | Ghose                                | No; 2 violations: MW>480, MR>130             |
| Log P <sub>o/w</sub> (XLOGP3)                                                                                                                                          | 5.11                                              | Veber                                | Yes                                          |
| Log P <sub>o/w</sub> (WLOGP)                                                                                                                                           | 1.91                                              | Egan                                 | Yes                                          |
| Log P <sub>o/w</sub> (MLOGP)                                                                                                                                           | 2.00                                              | Muegge                               | No; 3 violations: MW>600, XLOGP3>5, #rings>7 |
| Log P <sub>o/w</sub> (SILICOS-IT)                                                                                                                                      | -2.85                                             | Bioavailability Score                | 0.55                                         |
| Consensus Log P <sub>o/w</sub>                                                                                                                                         | 1.23                                              | <b>Medicinal Chemistry</b>           |                                              |
|                                                                                                                                                                        |                                                   | PAINS                                | 0 alert                                      |
|                                                                                                                                                                        |                                                   | Brenk                                | 0 alert                                      |
|                                                                                                                                                                        |                                                   | Leadlikeness                         | No; 2 violations: MW>350, XLOGP3>3.5         |
|                                                                                                                                                                        |                                                   | Synthetic accessibility              | 6.13                                         |
